# Supplementary material for: Raman signatures of type A and B influenza viruses: molecular origin of the “ catch and kill ” inactivation mechanism mediated by micrometric silicon nitride powder
Source: Royal Society of Chemistry journal article supplement (doi:10.1039/d4cb00237g), 2025-01-01
Supplement: d4cb00237g1.pdf [file d4cb00237g1.pdf]

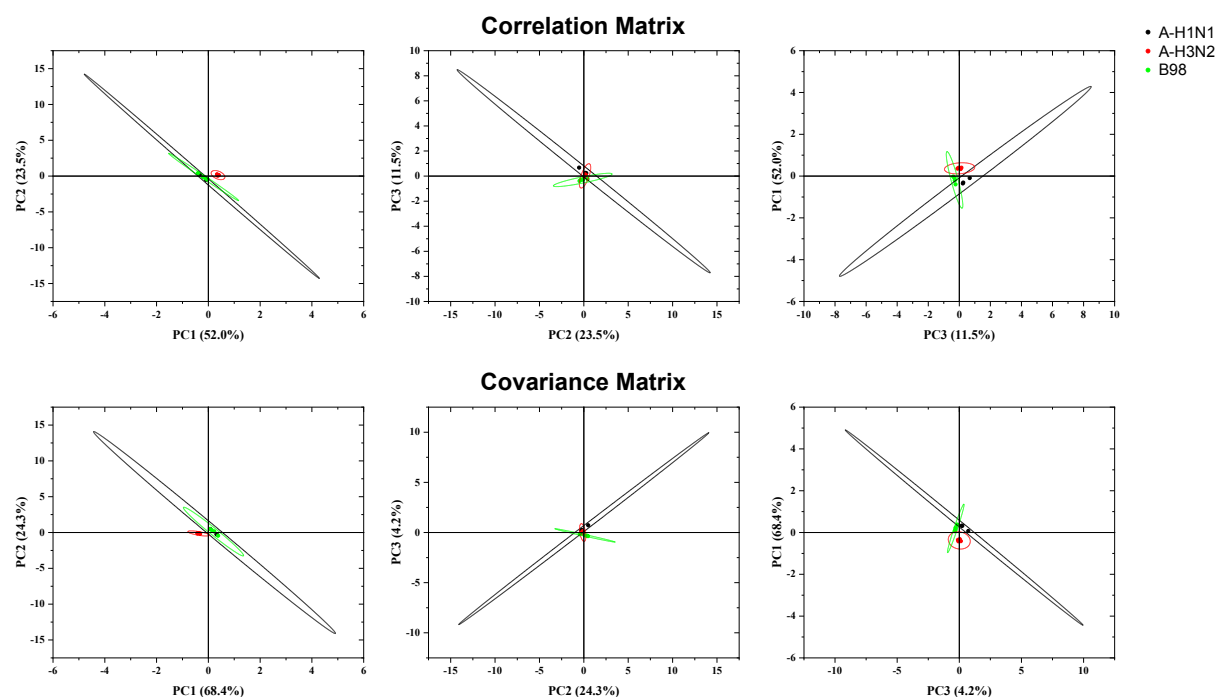

**Figure S3:** Correlation and covariance matrices (cf. labels in inset) computed for the Raman spectra of the three influenza variants studied in the paper (cf. labels); as seen, none of the principal component combination allows a clear assignment of the spectrum to a given variant.
