# Supplementary material for: Raman signatures of type A and B influenza viruses: molecular origin of the “ catch and kill ” inactivation mechanism mediated by micrometric silicon nitride powder
Source: Royal Society of Chemistry journal article supplement (doi:10.1039/d4cb00237g), 2025-01-01
Supplement: d4cb00237g4.pdf [file d4cb00237g4.pdf]

# Table S-I

| Band <sup>#</sup> | cm <sup>-1</sup> | Vibrational origin                                                                                                                                         | Ref. <sup>##</sup> |
|-------------------|------------------|------------------------------------------------------------------------------------------------------------------------------------------------------------|--------------------|
| 1                 | 604              | C=O bending in RNA cytosine & guanine                                                                                                                      | 48                 |
| 2                 | 622              | Ring deformation in RNA adenine<br>C-S stretching in cysteine ( <i>gauche</i> )                                                                            | 45,48              |
| 3                 | 640              | C-C-S stretching in methionine (CH <sub>2</sub> side; <i>gauche</i> )                                                                                      | 45                 |
| 4                 | 653              | C-S stretching in methionine (CH <sub>2</sub> side; <i>gauche</i> )                                                                                        | 45                 |
| 4*                | 662              | -C(H <sub>2</sub> )-S- stretching in methionine with H atom at the <i>trans</i> position<br>C-S stretching on CH <sub>2</sub> side in methionine sulfoxide | 46,47              |
| 5                 | 669              | C-S stretching in methionine (CH <sub>2</sub> side; <i>trans</i> )                                                                                         | 45                 |
| 6                 | 687              | Pyrrole ring deformation in RNA adenine & guanine<br>C-S stretching in cysteine ( <i>trans</i> )                                                           | 45,48              |
| 7                 | 696              | C-S stretching in methionine (CH <sub>3</sub> side; <i>gauche</i> )                                                                                        | 45                 |
| 8                 | 713              | C-S-C stretching in methionine (CH <sub>3</sub> side; <i>trans</i> )                                                                                       | 45                 |
| 8*                | 725              | -S-CH <sub>3</sub> stretching in methionine sulfoxide<br>C-S stretching on CH <sub>3</sub> side in methionine sulfoxide                                    | 46,47              |
| 9                 | 738              | Benzene ring breathing in RNA adenine                                                                                                                      | 48                 |
| 10                | 752              | Ring deformation in RNA cytosine<br>Breathing of indolyl ring in tryptophan                                                                                | 45,48              |
| 10*               | 764              | -C(H <sub>2</sub> )-S- stretching in methionine (with C atoms at the <i>trans</i> position)<br>CH <sub>2</sub> rocking in methylene groups                 | 46,47              |
| 11                | 769              | C <sub>β</sub> H <sub>2</sub> rocking in methionine                                                                                                        | 45                 |
| 12                | 798              | Ring breathing in RNA cytosine<br>C <sub>α</sub> H <sub>2</sub> rocking in methionine                                                                      | 45,48              |

<sup>#</sup>Numbers and colors are the same as those of the sub-bands shown in Fig. 4 of the main paper.

<sup>##</sup>Reference numbers are the same as those listed in the main paper.
