# Supplementary material for: Raman signatures of type A and B influenza viruses: molecular origin of the “ catch and kill ” inactivation mechanism mediated by micrometric silicon nitride powder
Source: Royal Society of Chemistry journal article supplement (doi:10.1039/d4cb00237g), 2025-01-01
Supplement: d4cb00237g5.pdf [file d4cb00237g5.pdf]

# Table S-II

| Band <sup>#</sup> | cm <sup>-1</sup> | Vibrational origin                                                | Ref. <sup>##</sup> |
|-------------------|------------------|-------------------------------------------------------------------|--------------------|
| 13                | 800              | Ring breathing in RNA cytosine                                    | 48                 |
| 14                | 824              | Out-of-plane CH bending in tyrosine                               | 50                 |
| 15                | 844              | Ring deformation in tyrosinate                                    | 50                 |
| 16                | 852              | In-plane ring breathing in tyrosine                               | 50                 |
| 17                | 863              | 5-ring & 6-ring deformation in RNA guanine                        | 48                 |
| 18                | 881              | C–C stretching & CH <sub>2</sub> rocking in methionine            | 45                 |
| 19                | 899              | Ring deformation in RNA guanine                                   | 48                 |
| 20                | 913              | 6-ring deformation in RNA adenine                                 | 48                 |
| 21                | 929              | Ring deformation in RNA adenine<br>C–C stretching in homocysteine | 48,51              |
| 22                | 940              | C–N stretching in amino acids                                     | 45                 |
| 22*               | 959              | S–H in-plane bending in homocysteine                              | 51                 |
| 23                | 965              | 5-ring deformation in RNA guanine                                 | 48                 |
| 24                | 985              | Amide III                                                         | 11                 |
| 25                | 1004             | Ring stretching in phenylalanine                                  | 48                 |

<sup>#</sup>Numbers and colors are the same as those of the sub-bands shown in Fig. 5 of the main paper.

<sup>##</sup>Reference numbers are the same as those listed in the main paper.
