# Supplementary material for: Raman signatures of type A and B influenza viruses: molecular origin of the “ catch and kill ” inactivation mechanism mediated by micrometric silicon nitride powder
Source: Royal Society of Chemistry journal article supplement (doi:10.1039/d4cb00237g), 2025-01-01
Supplement: d4cb00237g6.pdf [file d4cb00237g6.pdf]

# Table S-III

| Band <sup>#</sup> | cm <sup>-1</sup> | Vibrational origin                                                                                                                         | Ref. <sup>##</sup> |
|-------------------|------------------|--------------------------------------------------------------------------------------------------------------------------------------------|--------------------|
| 26                | 1014             | C=O bending in cytosine & guanine                                                                                                          | 48                 |
| 27                | 1022             | Ring deformation in uracil                                                                                                                 | 48                 |
| 28                | 1043             | S=O stretching in methionine sulfoxide                                                                                                     | 47                 |
| 29                | 1058             | C–C stretching in amino acid residues                                                                                                      | 45                 |
| 30                | 1070             | C–C stretching in amino acid residues                                                                                                      | 45                 |
| 31                | 1083             | Pyrrole ring deformation in RNA adenine<br>C–N–H <sub>2</sub> asymmetric bending in arginine<br>H-scissoring of pyrrole ring in tryptophan | 45,48              |
| 32                | 1106             | O–P–O stretching in RNA backbone<br>NH <sub>3</sub> asymmetric rocking in histidine                                                        | 11,45              |
| 33                | 1125             | C–S–C stretching in methionine (CH <sub>3</sub> side; <i>trans</i> )<br>H-scissoring of benzene ring in tryptophan                         | 45,47              |
| 33*               | 1141             | C–S–C stretching in methionine (CH <sub>3</sub> side; thioether configuration)                                                             | 47                 |
| 34                | 1152             | Benzene ring breathing in RNA adenine                                                                                                      | 48                 |
| 35                | 1172             | C–H stretching in methionine                                                                                                               | 45                 |
| 36                | 1191             | C–H bending and C–O stretching in phenylalanine                                                                                            | 45                 |
| 37                | 1201             | Amide III                                                                                                                                  | 11                 |

<sup>#</sup>Numbers and colors are the same as those of the sub-bands shown in Fig. 6 of the main paper.

<sup>##</sup>Reference numbers are the same as those listed in the main paper.
