# Supplementary material for: Raman signatures of type A and B influenza viruses: molecular origin of the “ catch and kill ” inactivation mechanism mediated by micrometric silicon nitride powder
Source: Royal Society of Chemistry journal article supplement (doi:10.1039/d4cb00237g), 2025-01-01
Supplement: d4cb00237g7.pdf [file d4cb00237g7.pdf]

# Table S-IV

| Band# | cm <sup>-1</sup> | Vibrational origin                                                                             | Ref.## |
|-------|------------------|------------------------------------------------------------------------------------------------|--------|
| 38    | 1210             | Ring deformation in phenylalanine                                                              | 45     |
| 39    | 1221             | Amide III                                                                                      | 11     |
| 39*   | 1236             | <i>N</i> -formyl group bending in <i>N</i> -formylkynurenine                                   | 98     |
| 40    | 1246             | Amide III                                                                                      | 11     |
| 41    | 1257             | Amide III<br>H-rocking of benzene ring in tryptophan                                           | 11,45  |
| 42    | 1269             | Amide III                                                                                      | 11     |
| 42*   | 1278             | CH <sub>2</sub> wagging, NH <sub>2</sub> twisting & C–C–H out-of-plane bending in homocysteine | 51     |
| 43    | 1291             | C–H bending                                                                                    | 45     |
| 44    | 1305             | CH <sub>3</sub> /CH <sub>2</sub> twisting, wagging & bending                                   | 45     |
| 45    | 1326             | CH <sub>3</sub> /CH <sub>2</sub> twisting, wagging                                             | 45     |
| 46    | 1337             | C–H bending in tryptophan                                                                      | 45     |
| 47    | 1345             | C–H bending in tryptophan                                                                      | 45     |
| 48    | 1366             | C–N stretching in indole ring of tryptophan                                                    | 45     |
| 48*   | 1380             | C–N stretching in indole ring of fully deprotonated tryptophan                                 | 29     |
| 49    | 1393             | C–H rocking & CH <sub>2</sub> deformation                                                      | 45     |

<sup>#</sup>Numbers and colors are the same as those of the sub-bands shown in Fig. 7 of the main paper.

<sup>##</sup>Reference numbers are the same as those listed in the main paper.
