# Supplementary material for: Raman signatures of type A and B influenza viruses: molecular origin of the “ catch and kill ” inactivation mechanism mediated by micrometric silicon nitride powder
Source: Royal Society of Chemistry journal article supplement (doi:10.1039/d4cb00237g), 2025-01-01
Supplement: d4cb00237g8.pdf [file d4cb00237g8.pdf]

# Table S-V

| Band <sup>#</sup> | cm <sup>-1</sup> | Vibrational origin                                                                                         | Ref. <sup>##</sup> |
|-------------------|------------------|------------------------------------------------------------------------------------------------------------|--------------------|
| 49*               | 1414             | –COO <sup>-</sup> symmetric stretching in homocysteine                                                     | 51                 |
| 50                | 1438             | CH <sub>2</sub> deformation & scissoring                                                                   | 45                 |
| 51                | 1457             | CH <sub>2</sub> wagging, CH <sub>2</sub> /CH <sub>3</sub> deformation                                      | 45                 |
| 52                | 1488             | CH <sub>2</sub> scissoring in tyrosine                                                                     | 50                 |
| 53                | 1502             | NH <sub>3</sub> symmetric bending in tyrosine                                                              | 50                 |
| 54                | 1515             | C–C–H & C–N stretching in tyrosine                                                                         | 50                 |
| 55                | 1528             | C4=C5 stretching in imidazole ring of deprotonated histidine (imidazolate)                                 | 93                 |
| 56                | 1546             | C2=C3 stretching in pyrrole ring of tryptophan                                                             | 93                 |
| 57                | 1575             | C4=C5 stretching in imidazole ring of $\tau$ histidine tautomer                                            | 93                 |
| 57*               | 1584             | C4=C5 stretching in imidazole ring of $\pi$ histidine tautomer                                             | 93                 |
| 58                | 1598             | –COO <sup>-</sup> asymmetric stretching in homocysteine<br>NH <sub>3</sub> bending in methionine sulfoxide | 51                 |

<sup>#</sup>Numbers and colors are the same as those of the sub-bands shown in Fig. 8 of the main paper.

<sup>##</sup>Reference numbers are the same as those listed in the main paper.
