# Supplementary material for: Raman signatures of type A and B influenza viruses: molecular origin of the “ catch and kill ” inactivation mechanism mediated by micrometric silicon nitride powder
Source: Royal Society of Chemistry journal article supplement (doi:10.1039/d4cb00237g), 2025-01-01
Supplement: d4cb00237g9.pdf [file d4cb00237g9.pdf]

Table S-VI

| Band <sup>#</sup> | cm <sup>-1</sup> | Vibrational origin                                                                              | Ref. <sup>##</sup> |
|-------------------|------------------|-------------------------------------------------------------------------------------------------|--------------------|
| 59                | 1606             | C–C stretching in phenylalanine, tyrosine & tryptophan                                          | 45                 |
| 60                | 1619             | C=C stretching in aromatic amino acids                                                          | 45                 |
| 61                | 1638             | C4=C5 stretching in imidazole ring of biprotonated histidine (imidazolium)<br>Amide I (β-sheet) | 53,93              |
| 62                | 1657             | Amide I (α-helix)                                                                               | 53                 |
| 63                | 1679             | Amide I (random coil)                                                                           | 53                 |
| 64                | 1704             | Amide I (β-turn)                                                                                | 53                 |
| 65                | 1715             | Amide I (β-turn)<br>C=O stretching in amino acids                                               | 45,53              |
| 66                | 1727             | C=O stretching in <i>FapyGua</i> and <i>FapyAde</i><br>C=O stretching in lipids                 | 54,61              |
| 67                | 1742             | C=O stretching in <i>FapyGua</i> and <i>FapyAde</i><br>C=O stretching in lipids                 | 54,61              |

<sup>#</sup>Numbers and colors are the same as those of the sub-bands shown in Fig. 9 of the main paper.

<sup>##</sup>Reference numbers are the same as those listed in the main paper.
